# Supplementary material for: A 3D organic–inorganic network constructed from an Anderson-type polyoxometalate anion, a copper complex and a tetrameric [Na4(H2O)14]4+ cluster,
Source: Royal Society of Chemistry journal article supplement (doi:10.1039/b924394a), 2010-01-01
Supplement: b924394a.pdf [file b924394a.pdf]

# Supplementary Information

## A 3D organic-inorganic network constructed from Anderson-type polyoxometalate anion, copper complex and tetrameric $[\text{Na}_4(\text{H}_2\text{O})_{14}]^{4+}$ cluster

Suzhi Li,<sup>a</sup> Pengtao Ma,<sup>a</sup> Jingping Wang,<sup>\*a</sup> Yuanyuan Guo,<sup>a</sup> Haizhu Niu,<sup>a</sup> Junwei Zhao,<sup>a</sup> and Jingyang Niu<sup>\*a</sup>

<sup>a</sup>Institute of Molecular and Crystal Engineering, College of Chemistry and Chemical Engineering, Henan University, Kaifeng, Henan 475004, P. R. China. E-mail: jpwang@henu.edu.cn; jyniu@henu.edu.cn; Fax: (+86) 378-3886876

**Fig. S1** Comparison of the calculated and experimental XRD patterns of **1** in the angular range  $2\theta = 5\text{--}40^\circ$  at 293 K.

**Fig. S2** The coordination environment of Cu atom.

**Fig. S3** (a) XPS spectra of **1** for Mo 3d<sub>5/2</sub> and Mo3d<sub>3/2</sub>. (b) XPS spectra of **1** for Cu 2p<sub>3/2</sub> and Cu2p<sub>1/2</sub>.

**Fig. S4** The IR spectra of **1** and H<sub>2</sub>PDA ligand.

**Fig. S5** The UV spectra of **1**, **2** and H<sub>2</sub>PDA ligand.

**Fig. S6** The TG/DTA curve of **1**.

**Fig. S7** The blue crystals of **1**.

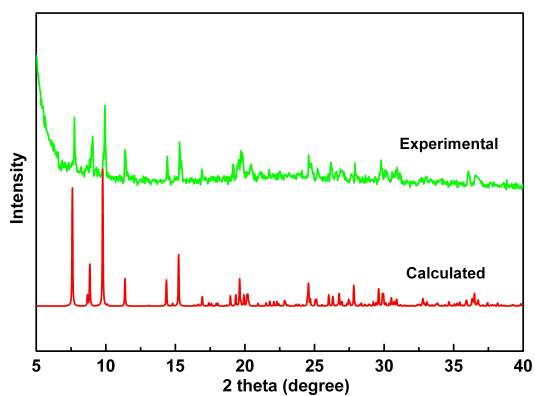

**Fig. S1** Comparison of the calculated and experimental XRD patterns of **1** in the angular range  $2\theta = 5\text{--}40^\circ$  at 293 K.

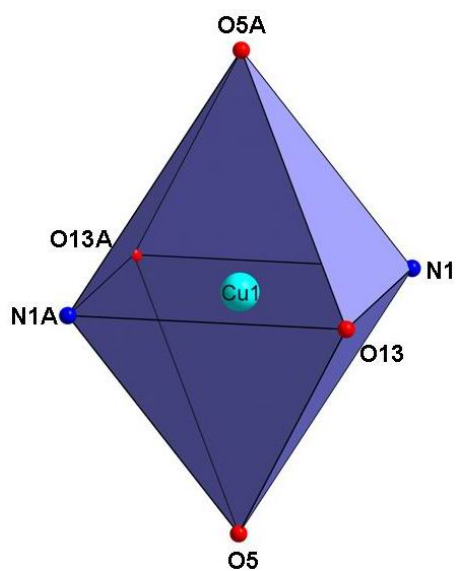

**Fig. S2** The coordination environment of Cu atom.

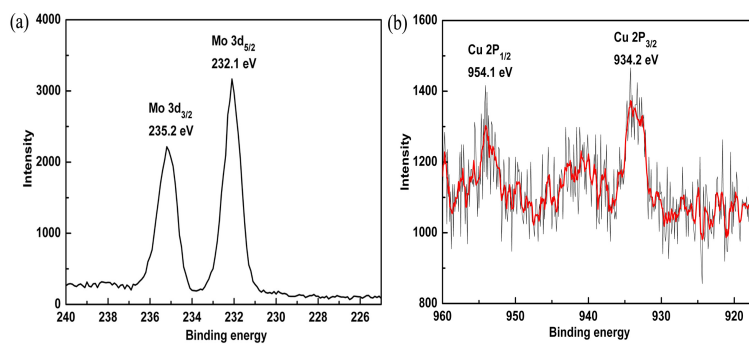

**Fig. S3** (a) XPS spectra of **1** for Mo 3d<sub>5/2</sub> and Mo 3d<sub>3/2</sub>. (b) XPS spectra of **1** for Cu 2p<sub>3/2</sub> and Cu 2p<sub>1/2</sub>.

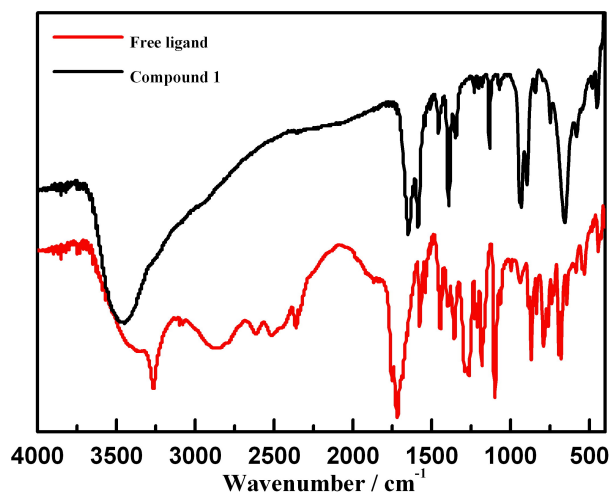

Fig. S4 The IR spectra of **1** and H<sub>2</sub>PDA ligand.

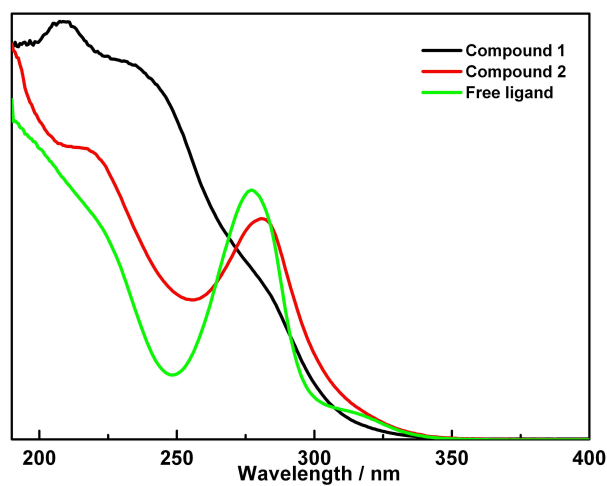

Fig. S5 The UV spectra of **1**, **2** and H<sub>2</sub>PDA ligand.

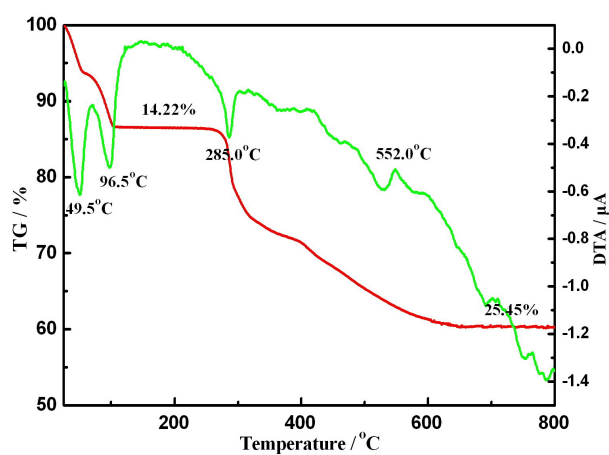

Fig. S6 The TG/DTA curve of **1**.

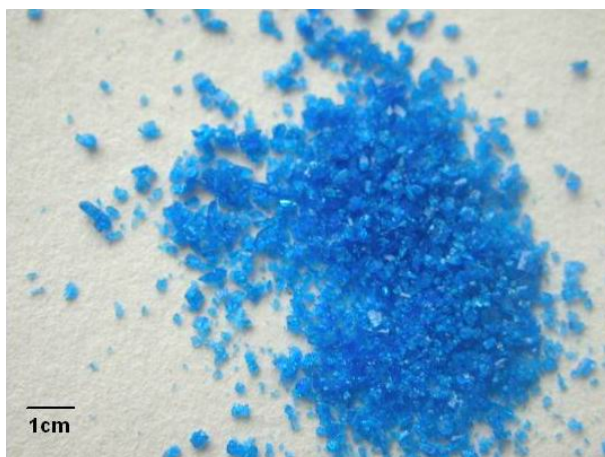

**Fig. S7** The blue crystals of **1**.
